# Supplementary material
Source: PubMed Central journal article supplement (PMC6325477)
Supplement: ajcr0008-2436-f7.pdf [file ajcr0008-2436-f7.pdf]

## Overexpression of YEATS4 in gastric cancer

**Supplementary Table 1.** Clinical and survival data of GC patients

| ID | IHC intensity | YEATS4 expression | Gender | Years old | pT TNM | pN TNM | ly | v | p Stage TNM | Location | Histology         | Tumor size | Overall survival (days) | Dead or Alive | Recurrence-free survival (days) | Recurrence |
|----|---------------|-------------------|--------|-----------|--------|--------|----|---|-------------|----------|-------------------|------------|-------------------------|---------------|---------------------------------|------------|
| 1  | 0             | Low               | M      | 50        | T1     | 0      | 1  | 0 | I           | L        | Un-differentiated | < 6 mm     | 2000                    | Alive         | 2000                            | Absent     |
| 2  | 3             | High              | M      | 62        | T1     | 0      | 0  | 0 | I           | U        | Differentiated    | ≥ 6 mm     | 1892                    | Alive         | 2000                            | Absent     |
| 3  | 2             | High              | F      | 27        | T4     | 3      | 3  | 2 | III         | M        | Un-differentiated | ≥ 6 mm     | 186                     | Dead          | 148                             | Present    |
| 4  | 3             | High              | M      | 63        | T3     | 3      | 2  | 1 | III         | U        | Un-differentiated | ≥ 6 mm     | 285                     | Dead          | 180                             | Present    |
| 5  | 0             | Low               | M      | 60        | T2     | 0      | 1  | 0 | I           | M        | Differentiated    | < 6 mm     | 2000                    | Alive         | 2000                            | Absent     |
| 6  | 0             | Low               | M      | 62        | T1     | 0      | 0  | 0 | I           | M        | Differentiated    | < 6 mm     | 103                     | Alive         | 2000                            | Absent     |
| 7  | 1             | Low               | M      | 86        | T1     | 0      | 0  | 0 | I           | L        | Differentiated    | < 6 mm     | 44                      | Alive         | 2000                            | Absent     |
| 8  | 0             | Low               | M      | 51        | T1     | 0      | 0  | 0 | I           | M        | Differentiated    | < 6 mm     | 2000                    | Alive         | 2000                            | Absent     |
| 9  | 0             | Low               | M      | 55        | T1     | 1      | 0  | 0 | I           | L        | Un-differentiated | < 6 mm     | 16                      | Alive         | 2000                            | Absent     |
| 10 | 1             | Low               | M      | 53        | T1     | 0      | 0  | 0 | I           | L        | Un-differentiated | < 6 mm     | 2000                    | Alive         | 2000                            | Absent     |
| 11 | 0             | Low               | M      | 75        | T4     | 3      | 3  | 3 | III         | U        | Un-differentiated | ≥ 6 mm     | 201                     | Dead          | 73                              | Present    |
| 12 | 1             | Low               | M      | 75        | T1     | 0      | 0  | 0 | I           | L        | Un-differentiated | < 6 mm     | 2000                    | Alive         | 2000                            | Absent     |
| 13 | 0             | Low               | M      | 68        | T1     | 0      | 1  | 1 | I           | M        | Un-differentiated | < 6 mm     | 2000                    | Alive         | 2000                            | Absent     |
| 14 | 0             | Low               | M      | 54        | T1     | 0      | 0  | 0 | I           | M        | Un-differentiated | < 6 mm     | 2000                    | Alive         | 2000                            | Absent     |
| 15 | 1             | Low               | F      | 71        | T1     | 0      | 0  | 2 | I           | L        | Differentiated    | ≥ 6 mm     | 2000                    | Alive         | 2000                            | Absent     |
| 16 | 1             | Low               | M      | 54        | T1     | 0      | 0  | 1 | I           | M        | Un-differentiated | < 6 mm     | 1791                    | Alive         | 2000                            | Absent     |
| 17 | 0             | Low               | M      | 60        | T2     | 1      | 1  | 0 | II          | M        | Un-differentiated | < 6 mm     | 33                      | Alive         | 2000                            | Absent     |
| 18 | 0             | Low               | M      | 74        | T1     | 0      | 0  | 0 | I           | M        | Un-differentiated | < 6 mm     | 2000                    | Alive         | 2000                            | Absent     |
| 19 | 0             | Low               | F      | 62        | T4     | 3      | 2  | 0 | III         | L        | Differentiated    | < 6 mm     | 550                     | Dead          | 272                             | Present    |
| 20 | 2             | High              | F      | 75        | T4     | 3      | 2  | 0 | III         | M        | Un-differentiated | ≥ 6 mm     | 632                     | Dead          | 499                             | Present    |
| 21 | 0             | Low               | M      | 64        | T4     | 1      | 0  | 0 | III         | M        | Differentiated    | < 6 mm     | 2000                    | Alive         | 2000                            | Absent     |
| 22 | 0             | Low               | F      | 82        | T3     | 1      | 2  | 1 | II          | L        | Un-differentiated | ≥ 6 mm     | 391                     | Dead          | 199                             | Present    |
| 23 | 1             | Low               | M      | 61        | T2     | 0      | 1  | 0 | I           | U        | Un-differentiated | < 6 mm     | 2000                    | Alive         | 2000                            | Absent     |
| 24 | 0             | Low               | M      | 65        | T1     | 0      | 0  | 0 | I           | M        | Un-differentiated | < 6 mm     | 2000                    | Alive         | 2000                            | Absent     |
| 25 | 0             | Low               | F      | 79        | T1     | 0      | 0  | 0 | I           | L        | Un-differentiated | < 6 mm     | 2000                    | Alive         | 2000                            | Absent     |
| 26 | 1             | Low               | M      | 76        | T4     | 1      | 1  | 1 | III         | L        | Differentiated    | ≥ 6 mm     | 2000                    | Alive         | 2000                            | Absent     |
| 27 | 0             | Low               | F      | 39        | T4     | 2      | 1  | 0 | III         | L        | Un-differentiated | ≥ 6 mm     | 2000                    | Alive         | 2000                            | Absent     |
| 28 | 0             | Low               | F      | 57        | T2     | 3      | 3  | 1 | III         | M        | Differentiated    | < 6 mm     | 2000                    | Alive         | 2000                            | Absent     |
| 29 | 0             | Low               | F      | 63        | T1     | 0      | 0  | 0 | I           | M        | Un-differentiated | < 6 mm     | 2000                    | Alive         | 2000                            | Absent     |
| 30 | 0             | Low               | F      | 62        | T1     | 0      | 0  | 0 | I           | M        | Un-differentiated | ≥ 6 mm     | 2000                    | Alive         | 2000                            | Absent     |
| 31 | 0             | Low               | M      | 55        | T3     | 1      | 1  | 2 | II          | M        | Un-differentiated | ≥ 6 mm     | 2000                    | Dead          | 2000                            | Absent     |
| 32 | 2             | High              | M      | 55        | T3     | 3      | 2  | 0 | III         | U        | Differentiated    | ≥ 6 mm     | 994                     | Dead          | 721                             | Present    |
| 33 | 0             | Low               | F      | 64        | T1     | 0      | 0  | 0 | I           | M        | Un-differentiated | < 6 mm     | 2000                    | Alive         | 2000                            | Absent     |

## Overexpression of YEATS4 in gastric cancer

|    |   |      |   |    |    |   |   |   |     |   |                   |        |      |       |      |         |
|----|---|------|---|----|----|---|---|---|-----|---|-------------------|--------|------|-------|------|---------|
| 34 | 1 | Low  | M | 53 | T1 | 0 | 0 | 0 | I   | M | Un-differentiated | < 6 mm | 2000 | Alive | 2000 | Absent  |
| 35 | 0 | Low  | F | 73 | T3 | 2 | 1 | 1 | III | M | Differentiated    | < 6 mm | 513  | Dead  | 290  | Present |
| 36 | 1 | Low  | M | 71 | T1 | 0 | 0 | 0 | I   | U | Differentiated    | < 6 mm | 1694 | Alive | 2000 | Absent  |
| 37 | 2 | High | F | 37 | T3 | 3 | 1 | 0 | III | M | Un-differentiated | < 6 mm | 2000 | Alive | 2000 | Absent  |
| 38 | 0 | Low  | M | 46 | T1 | 0 | 0 | 0 | I   | L | Un-differentiated | < 6 mm | 1617 | Alive | 2000 | Absent  |
| 39 | 3 | High | M | 64 | T1 | 0 | 0 | 0 | I   | M | Un-differentiated | < 6 mm | 2000 | Alive | 2000 | Absent  |
| 40 | 1 | Low  | M | 66 | T3 | 3 | 3 | 3 | III | L | Differentiated    | < 6 mm | 766  | Dead  | 470  | Present |
| 41 | 1 | Low  | M | 51 | T4 | 3 | 1 | 1 | III | L | Differentiated    | ≥ 6 mm | 1075 | Dead  | 775  | Present |
| 42 | 2 | High | F | 45 | T4 | 0 | 2 | 0 | II  | M | Un-differentiated | ≥ 6 mm | 449  | Alive | 162  | Present |
| 43 | 1 | Low  | M | 71 | T1 | 0 | 0 | 0 | I   | U | Differentiated    | < 6 mm | 2000 | Alive | 2000 | Absent  |
| 44 | 3 | High | M | 65 | T4 | 3 | 3 | 2 | III | L | Un-differentiated | ≥ 6 mm | 178  | Dead  | 110  | Present |
| 45 | 0 | Low  | M | 65 | T1 | 0 | 0 | 0 | I   | M | Differentiated    | < 6 mm | 1778 | Alive | 2000 | Absent  |
| 46 | 1 | Low  | M | 51 | T1 | 1 | 0 | 0 | I   | L | Un-differentiated | < 6 mm | 2000 | Alive | 2000 | Absent  |
| 47 | 2 | High | F | 55 | T3 | 0 | 0 | 0 | II  | M | Un-differentiated | < 6 mm | 2000 | Alive | 2000 | Absent  |
| 48 | 3 | High | F | 85 | T4 | 2 | 2 | 1 | III | L | Un-differentiated | ≥ 6 mm | 613  | Dead  | 558  | Present |
| 49 | 1 | Low  | F | 55 | T1 | 0 | 0 | 0 | I   | L | Un-differentiated | ≥ 6 mm | 2000 | Alive | 2000 | Absent  |
| 50 | 1 | Low  | M | 79 | T1 | 1 | 1 | 1 | I   | M | Differentiated    | < 6 mm | 2000 | Alive | 2000 | Absent  |
| 51 | 2 | High | M | 65 | T3 | 1 | 0 | 3 | II  | L | Un-differentiated | < 6 mm | 1256 | Dead  | 847  | Present |
| 52 | 0 | Low  | F | 74 | T3 | 3 | 3 | 3 | III | L | Differentiated    | < 6 mm | 106  | Dead  | 75   | Present |
| 53 | 2 | High | M | 79 | T4 | 3 | 2 | 0 | III | U | Un-differentiated | ≥ 6 mm | 365  | Dead  | 225  | Present |
| 54 | 0 | Low  | F | 73 | T1 | 0 | 0 | 0 | I   | M | Un-differentiated | ≥ 6 mm | 2000 | Alive | 2000 | Absent  |
| 55 | 1 | Low  | M | 57 | T2 | 0 | 1 | 0 | I   | M | Un-differentiated | < 6 mm | 1873 | Alive | 2000 | Absent  |
| 56 | 0 | Low  | F | 51 | T4 | 0 | 0 | 0 | III | M | Un-differentiated | ≥ 6 mm | 92   | Alive | 2000 | Absent  |
| 57 | 2 | High | F | 87 | T4 | 3 | 2 | 1 | III | M | Un-differentiated | ≥ 6 mm | 141  | Dead  | 62   | Present |
| 58 | 1 | Low  | M | 46 | T2 | 0 | 1 | 0 | I   | L | Differentiated    | < 6 mm | 1202 | Alive | 2000 | Absent  |
| 59 | 0 | Low  | M | 75 | T1 | 0 | 1 | 1 | I   | M | Differentiated    | < 6 mm | 2000 | Alive | 2000 | Absent  |
| 60 | 3 | High | M | 65 | T4 | 3 | 1 | 1 | III | M | Differentiated    | ≥ 6 mm | 918  | Dead  | 202  | Present |
| 61 | 2 | High | M | 56 | T3 | 0 | 0 | 0 | II  | L | Un-differentiated | ≥ 6 mm | 2000 | Alive | 2000 | Absent  |
| 62 | 1 | Low  | F | 54 | T1 | 0 | 0 | 0 | I   | M | Un-differentiated | < 6 mm | 2000 | Alive | 2000 | Absent  |
| 63 | 1 | Low  | M | 70 | T1 | 0 | 0 | 0 | I   | L | Differentiated    | < 6 mm | 1937 | Alive | 2000 | Absent  |
| 64 | 0 | Low  | F | 68 | T1 | 0 | 0 | 0 | I   | M | Un-differentiated | < 6 mm | 2000 | Alive | 2000 | Absent  |
| 65 | 0 | Low  | M | 33 | T1 | 0 | 0 | 0 | I   | M | Un-differentiated | < 6 mm | 2000 | Alive | 2000 | Absent  |
| 66 | 2 | High | M | 69 | T4 | 2 | 3 | 1 | III | L | Un-differentiated | ≥ 6 mm | 1642 | Dead  | 1502 | Present |
| 67 | 0 | Low  | F | 66 | T3 | 0 | 2 | 1 | II  | L | Un-differentiated | ≥ 6 mm | 520  | Dead  | 289  | Present |
| 68 | 0 | Low  | M | 55 | T1 | 0 | 0 | 0 | I   | L | Differentiated    | < 6 mm | 2000 | Alive | 2000 | Absent  |
| 69 | 0 | Low  | F | 83 | T1 | 0 | 0 | 0 | I   | M | Differentiated    | < 6 mm | 2000 | Alive | 2000 | Absent  |

### Overexpression of YEATS4 in gastric cancer

|     |   |      |   |    |    |   |   |   |     |   |                   |        |      |       |      |         |
|-----|---|------|---|----|----|---|---|---|-----|---|-------------------|--------|------|-------|------|---------|
| 70  | 0 | Low  | F | 67 | T1 | 0 | 0 | 0 | I   | L | Un-differentiated | < 6 mm | 2000 | Alive | 2000 | Absent  |
| 71  | 0 | Low  | F | 61 | T1 | 0 | 1 | 0 | I   | L | Un-differentiated | < 6 mm | 2000 | Alive | 2000 | Absent  |
| 72  | 0 | Low  | M | 58 | T2 | 1 | 0 | 0 | II  | M | Un-differentiated | < 6 mm | 2000 | Alive | 2000 | Absent  |
| 73  | 0 | Low  | M | 78 | T1 | 0 | 0 | 0 | I   | M | Differentiated    | < 6 mm | 2000 | Alive | 2000 | Absent  |
| 74  | 1 | Low  | F | 39 | T3 | 1 | 2 | 0 | II  | L | Un-differentiated | ≥ 6 mm | 2000 | Alive | 2000 | Absent  |
| 75  | 1 | Low  | M | 50 | T1 | 0 | 0 | 0 | I   | L | Un-differentiated | < 6 mm | 2000 | Alive | 2000 | Absent  |
| 76  | 0 | Low  | F | 69 | T1 | 0 | 0 | 0 | I   | M | Un-differentiated | < 6 mm | 402  | Alive | 2000 | Absent  |
| 77  | 1 | Low  | F | 52 | T1 | 0 | 0 | 0 | I   | M | Un-differentiated | < 6 mm | 2000 | Alive | 2000 | Absent  |
| 78  | 2 | High | M | 57 | T1 | 0 | 0 | 0 | I   | M | Differentiated    | < 6 mm | 375  | Alive | 2000 | Absent  |
| 79  | 2 | High | M | 53 | T4 | 3 | 2 | 0 | III | L | Un-differentiated | ≥ 6 mm | 929  | Dead  | 67   | Present |
| 80  | 2 | High | M | 70 | T2 | 2 | 1 | 0 | II  | M | Differentiated    | < 6 mm | 2000 | Alive | 2000 | Absent  |
| 81  | 1 | Low  | M | 57 | T1 | 0 | 1 | 1 | I   | M | Differentiated    | ≥ 6 mm | 2000 | Alive | 2000 | Absent  |
| 82  | 0 | Low  | M | 52 | T1 | 0 | 1 | 0 | I   | U | Un-differentiated | < 6 mm | 2000 | Alive | 2000 | Absent  |
| 83  | 2 | High | M | 52 | T4 | 1 | 2 | 1 | III | M | Un-differentiated | < 6 mm | 2000 | Alive | 2000 | Absent  |
| 84  | 0 | Low  | M | 61 | T1 | 0 | 0 | 0 | I   | M | Un-differentiated | < 6 mm | 2000 | Alive | 2000 | Absent  |
| 85  | 2 | High | M | 73 | T1 | 0 | 0 | 0 | I   | M | Differentiated    | < 6 mm | 2000 | Alive | 2000 | Absent  |
| 86  | 0 | Low  | M | 53 | T1 | 0 | 0 | 0 | I   | M | Differentiated    | < 6 mm | 283  | Alive | 2000 | Absent  |
| 87  | 1 | Low  | F | 60 | T3 | 0 | 1 | 1 | II  | M | Un-differentiated | < 6 mm | 2000 | Alive | 2000 | Absent  |
| 88  | 0 | Low  | F | 56 | T1 | 0 | 0 | 0 | I   | M | Differentiated    | < 6 mm | 2000 | Alive | 2000 | Absent  |
| 89  | 0 | Low  | F | 67 | T1 | 0 | 0 | 0 | I   | L | Differentiated    | < 6 mm | 2000 | Alive | 2000 | Absent  |
| 90  | 0 | Low  | M | 56 | T1 | 0 | 0 | 0 | I   | M | Differentiated    | < 6 mm | 2000 | Alive | 2000 | Absent  |
| 91  | 2 | High | M | 59 | T1 | 0 | 0 | 0 | I   | M | Differentiated    | < 6 mm | 2000 | Alive | 2000 | Absent  |
| 92  | 0 | Low  | M | 51 | T4 | 3 | 1 | 1 | III | U | Differentiated    | < 6 mm | 1517 | Dead  | 39   | Present |
| 93  | 0 | Low  | F | 49 | T1 | 0 | 0 | 0 | I   | M | Un-differentiated | < 6 mm | 2000 | Alive | 2000 | Absent  |
| 94  | 0 | Low  | M | 64 | T4 | 2 | 2 | 0 | III | L | Differentiated    | ≥ 6 mm | 461  | Dead  | 199  | Present |
| 95  | 1 | Low  | M | 63 | T1 | 0 | 2 | 1 | I   | M | Differentiated    | < 6 mm | 1656 | Dead  | 2000 | Absent  |
| 96  | 2 | High | M | 51 | T4 | 3 | 2 | 1 | III | L | Un-differentiated | ≥ 6 mm | 322  | Dead  | 146  | Present |
| 97  | 0 | Low  | F | 61 | T1 | 0 | 0 | 0 | I   | M | Un-differentiated | < 6 mm | 2000 | Alive | 2000 | Absent  |
| 98  | 1 | Low  | M | 70 | T1 | 0 | 0 | 0 | I   | M | Differentiated    | < 6 mm | 2000 | Alive | 2000 | Absent  |
| 99  | 0 | Low  | M | 28 | T4 | 2 | 2 | 2 | III | U | Differentiated    | < 6 mm | 1349 | Dead  | 727  | Present |
| 100 | 2 | High | M | 51 | T4 | 2 | 1 | 0 | III | M | Un-differentiated | < 6 mm | 2000 | Alive | 2000 | Absent  |
| 101 | 1 | Low  | M | 70 | T1 | 0 | 1 | 0 | I   | L | Differentiated    | < 6 mm | 2000 | Alive | 2000 | Absent  |
| 102 | 0 | Low  | M | 57 | T1 | 0 | 0 | 0 | III | L | Differentiated    | < 6 mm | 2000 | Alive | 2000 | Absent  |
| 103 | 0 | Low  | F | 76 | T3 | 3 | 2 | 1 | III | L | Un-differentiated | ≥ 6 mm | 24   | Alive | 2000 | Absent  |
| 104 | 1 | Low  | M | 61 | T4 | 1 | 2 | 0 | III | M | Un-differentiated | ≥ 6 mm | 2000 | Alive | 2000 | Absent  |
| 105 | 1 | Low  | M | 64 | T1 | 0 | 0 | 0 | I   | L | Differentiated    | < 6 mm | 2000 | Alive | 2000 | Absent  |

### Overexpression of YEATS4 in gastric cancer

|     |   |      |   |    |    |   |   |   |     |   |                   |        |      |       |      |         |
|-----|---|------|---|----|----|---|---|---|-----|---|-------------------|--------|------|-------|------|---------|
| 106 | 2 | High | M | 71 | T3 | 2 | 3 | 2 | III | U | Differentiated    | < 6 mm | 2000 | Alive | 2000 | Absent  |
| 107 | 0 | Low  | M | 66 | T4 | 3 | 2 | 0 | III | L | Differentiated    | ≥ 6 mm | 990  | Alive | 2000 | Absent  |
| 108 | 0 | Low  | F | 67 | T1 | 0 | 0 | 0 | I   | M | Un-differentiated | < 6 mm | 1819 | Alive | 2000 | Absent  |
| 109 | 2 | High | M | 71 | T1 | 0 | 0 | 0 | I   | U | Differentiated    | < 6 mm | 2000 | Alive | 2000 | Absent  |
| 110 | 1 | Low  | M | 62 | T1 | 0 | 0 | 0 | I   | L | Differentiated    | < 6 mm | 2000 | Alive | 2000 | Absent  |
| 111 | 0 | Low  | M | 59 | T3 | 1 | 2 | 0 | II  | M | Un-differentiated | < 6 mm | 238  | Dead  | 238  | Present |
| 112 | 0 | Low  | M | 74 | T3 | 2 | 0 | 0 | III | U | Un-differentiated | < 6 mm | 1008 | Dead  | 828  | Present |
| 113 | 1 | Low  | F | 59 | T1 | 0 | 0 | 0 | I   | U | Differentiated    | < 6 mm | 2000 | Alive | 2000 | Absent  |
| 114 | 2 | High | M | 75 | T1 | 0 | 0 | 0 | I   | M | Differentiated    | < 6 mm | 58   | Alive | 2000 | Absent  |
| 115 | 0 | Low  | F | 75 | T1 | 0 | 1 | 0 | I   | M | Un-differentiated | < 6 mm | 2000 | Alive | 2000 | Absent  |
| 116 | 0 | Low  | M | 74 | T1 | 0 | 1 | 0 | I   | L | Differentiated    | < 6 mm | 38   | Alive | 2000 | Absent  |
| 117 | 1 | Low  | M | 75 | T4 | 1 | 1 | 2 | III | M | Differentiated    | ≥ 6 mm | 2000 | Alive | 2000 | Absent  |
| 118 | 0 | Low  | F | 67 | T4 | 0 | 1 | 0 | III | M | Un-differentiated | ≥ 6 mm | 241  | Alive | 2000 | Absent  |
| 119 | 0 | Low  | M | 88 | T1 | 0 | 0 | 0 | I   | M | Differentiated    | < 6 mm | 1926 | Alive | 2000 | Absent  |
| 120 | 0 | Low  | F | 44 | T1 | 0 | 0 | 0 | I   | M | Un-differentiated | < 6 mm | 2000 | Alive | 2000 | Absent  |
| 121 | 0 | Low  | M | 89 | T4 | 0 | 0 | 1 | III | L | Differentiated    | < 6 mm | 597  | Dead  | 284  | Present |
| 122 | 0 | Low  | M | 58 | T1 | 0 | 0 | 0 | I   | M | Differentiated    | < 6 mm | 2000 | Alive | 2000 | Absent  |
| 123 | 0 | Low  | M | 70 | T2 | 0 | 1 | 3 | I   | M | Differentiated    | < 6 mm | 2000 | Alive | 2000 | Absent  |
| 124 | 1 | Low  | M | 55 | T1 | 0 | 0 | 0 | I   | M | Differentiated    | < 6 mm | 80   | Alive | 2000 | Absent  |
| 125 | 0 | Low  | M | 64 | T1 | 0 | 1 | 2 | I   | L | Differentiated    | < 6 mm | 2000 | Alive | 2000 | Absent  |
| 126 | 2 | High | M | 69 | T4 | 3 | 3 | 0 | III | M | Differentiated    | ≥ 6 mm | 1685 | Dead  | 687  | Present |
| 127 | 2 | High | M | 86 | T3 | 1 | 1 | 2 | II  | U | Differentiated    | ≥ 6 mm | 578  | Dead  | 517  | Present |
| 128 | 0 | Low  | M | 58 | T2 | 0 | 1 | 0 | I   | M | Un-differentiated | < 6 mm | 2000 | Alive | 2000 | Absent  |
| 129 | 1 | Low  | M | 62 | T2 | 0 | 0 | 0 | I   | U | Differentiated    | ≥ 6 mm | 102  | Alive | 2000 | Absent  |
| 130 | 2 | High | M | 74 | T3 | 3 | 2 | 2 | III | U | Differentiated    | ≥ 6 mm | 154  | Dead  | 115  | Present |
| 131 | 1 | Low  | M | 39 | T3 | 1 | 1 | 0 | II  | L | Un-differentiated | < 6 mm | 1111 | Alive | 2000 | Absent  |
| 132 | 1 | Low  | M | 73 | T2 | 0 | 0 | 0 | I   | M | Differentiated    | < 6 mm | 2000 | Alive | 2000 | Absent  |
| 133 | 0 | Low  | M | 80 | T4 | 3 | 1 | 2 | III | L | Un-differentiated | ≥ 6 mm | 589  | Dead  | 317  | Present |
| 134 | 0 | Low  | M | 76 | T1 | 0 | 0 | 0 | I   | L | Un-differentiated | < 6 mm | 405  | Alive | 2000 | Absent  |
| 135 | 2 | High | M | 79 | T2 | 3 | 3 | 2 | III | L | Differentiated    | < 6 mm | 722  | Dead  | 668  | Present |
